# Supplementary material
Source: Research Square preprint supplement (doi:10.21203/rs.3.rs-8904913/v1)
Supplement: Supplementary file 1 [file 5d2964827dc7dd7403e283af.docx]

**Supplementary Information**

**Toxic and useful: Harnessing yeast killer toxins for product recovery**

Ankita Suri1, Michael Norman1, David Wollborn2, Tom Loan3, Jian-Wei Liu4, Shoko Okada1*

*Corresponding author: shoko.okada@csiro.au

**Affiliations**

1. CSIRO, Agriculture and Food, Canberra, 2601, Australia
2. CSIRO, Agriculture and Food, Werribee, 3030, Australia
3. Centre for Future Materials, Research School of Biology, Australian National University, Acton, ACT 2601, Australia
4. CSIRO, Environment, Canberra, 2601, Australia

Table S 1 List of plasmids used in this study

| Plasmids | Description | Source |
| --- | --- | --- |
| pESC-His | HIS3, f1 ori, *ADH1* terminator, MCS1/FLAG, PGAL10/PGAL1, MCS2/myc, *CYC1* terminator, pUC ori, ampicillin, 2μ ori. | Agilent technologies # 217451 |
| pmCherry | URA3, 2μ ori, AmpR+ColE1, PTDH3-AAACA-*mCherry*-TCY1 | This study |
| pHM-1 | HIS3, 2μ ori, KanR+ColE1, PGAL1-AAACA-*HM-1*- TCYC1 | This study |
| pHSK | HIS3, 2μ ori, KanR+ColE1, PGAL1-AAACA-*HSK*- TCYC1 | This study |
| pTruncatedK2 | HIS3, 2μ ori, KanR+ColE1, PGAL1-AAACA-*TruncatedK2* - TCYC1 | This study |
| pZygocin | HIS3, 2μ ori, KanR+ColE1, PGAL1-AAACA-*Zygocin-* TCYC1 | This study |
| pZymocin | HIS3, 2μ ori, KanR+ColE1, PGAL1-AAACA-*Zygocin-* TCYC1 | This study |

Figure S 1 A Serial dilution spot assay of S. cerevisiae BY4741 expressing different yeast killer toxins. Cultures were serially diluted 10-fold (10⁻² to 10⁻⁶) and spotted onto selective SCI agar plates of pH 4.6 or 5.5 and incubated at 30 °C for 72 h .


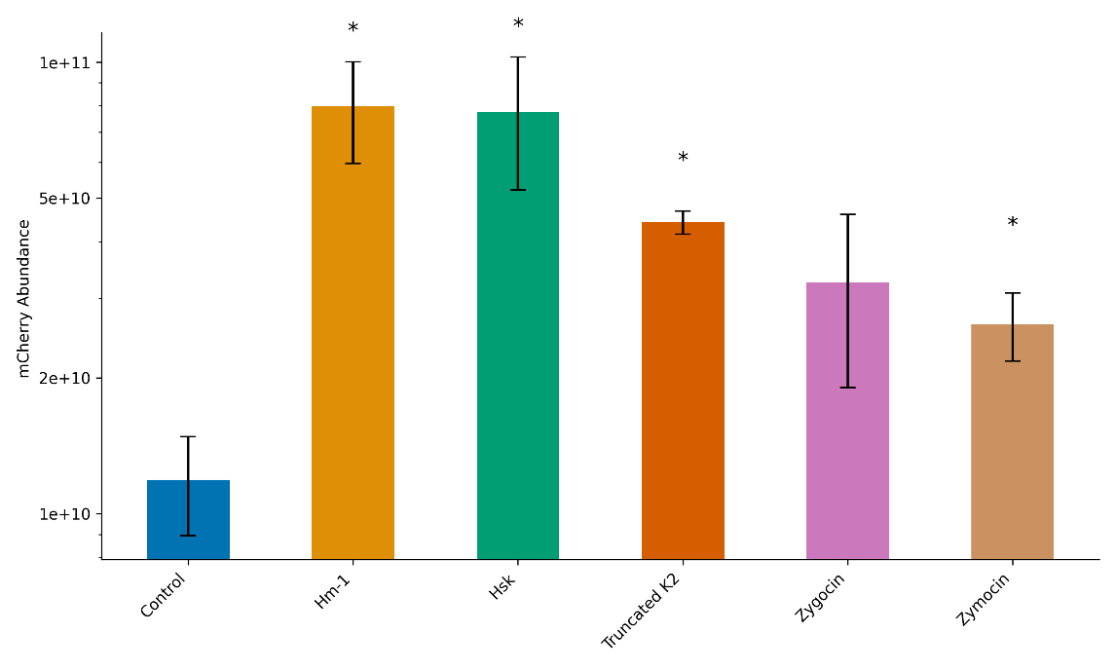


Figure S 2 mCherry abundance quantified by proteomics (LC-MS/MS) in culture supernatant of S. cerevisiae strains expressing different killer toxins. Bar represents the mean mCherry abundance (mean± SD, n=3). * represents significance of each toxin compared to the control strain (Games-Howell test, p value <0.05).


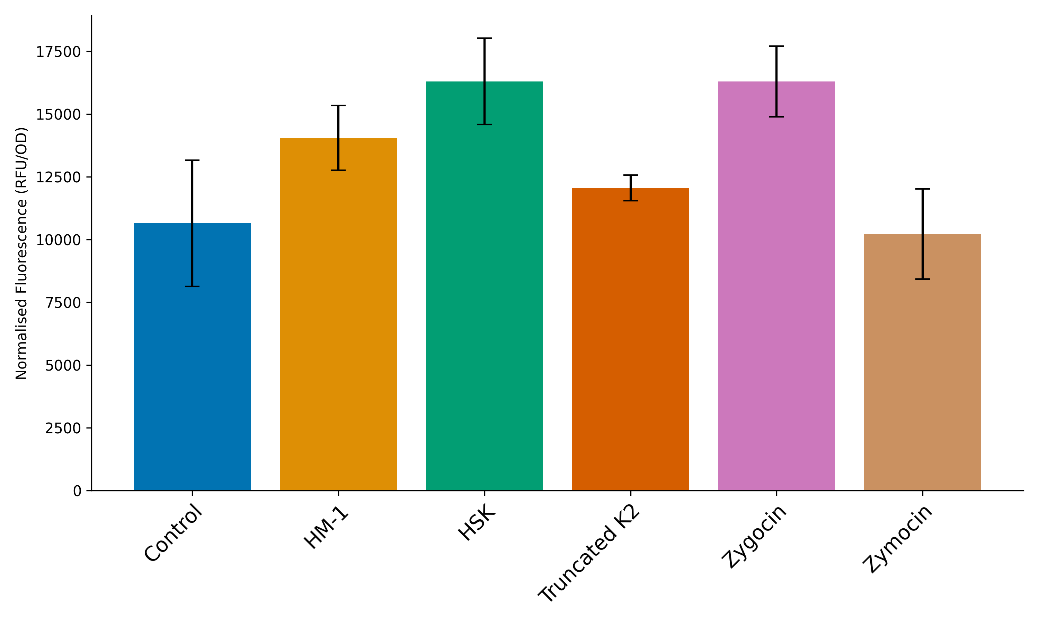


Figure S 3 Intracellular mCherry fluorescence measured in empty vector control and toxin-expressing yeast strains before mechanical disruption. The cultures were adjusted to an O.D.600nm of 0.5 and the measured fluorescence was normalised by O.D.600nm. Data represent mean ± SD from three biological replicates (n=3). Statistical analysis used Welch’s one way ANOVA followed by Games-Howell comparison against control strain.
